# Supplementary material for: A Genome-Wide Survey of the Microsatellite Content of the Globe Artichoke Genome and the Development of a Web-Based Database
Source: PLoS One. 2016 Sep 20;11(9):e0162841. doi: 10.1371/journal.pone.0162841 (PMC5029897; doi:10.1371/journal.pone.0162841)
Supplement: S5 Table — (XLSX) [file pone.0162841.s005.xlsx]

## Sheet: Table S5
Supplementary Table S5. The chromosome-by-chromosome distribution of perfect and imperfect microsatellite in the globe artichoke gene.
		PERFECT								IMPERFECT
Linkage groups		Mono-	Di-	Tri-	Tetra-	Penta-	Hexa-	Total		Mono-	Di-	Tri-	Tetra-	Penta-	Hexa-	Total
LG01		10	88	237	27	14	58	434		10	106	255	37	49	139	596
LG02		5	103	228	29	9	48	422		5	128	246	42	42	143	606
LG03		9	69	202	25	17	38	360		9	82	215	39	41	109	495
LG04		3	29	84	9	7	20	152		3	34	91	15	15	57	215
LG05		4	58	183	14	11	39	309		4	70	185	19	30	97	405
LG06		2	37	102	8	2	13	164		2	46	117	11	7	41	224
LG07		3	25	99	12	5	17	161		3	35	107	18	21	67	251
LG08		5	69	139	24	16	15	268		5	83	154	28	34	52	356
LG09		5	34	106	17	3	18	183		5	39	109	20	18	42	233
LG10		11	57	134	19	4	36	261		12	69	141	27	25	81	355
LG11		7	62	173	18	8	26	294		7	72	188	27	33	66	393
LG12		5	62	135	23	8	27	260		5	76	148	29	24	66	348
LG13		10	67	164	19	10	50	320		11	83	173	23	36	120	446
LG14		0	26	53	6	1	12	98		0	34	58	11	6	35	144
LG15		7	60	156	18	3	27	271		7	73	157	25	13	83	358
LG16		4	33	98	10	8	8	161		4	40	101	16	19	44	224
LG17		8	42	126	11	5	19	211		10	55	136	22	29	60	312
LG00		10	99	195	38	20	70	432		10	118	213	53	51	177	622
Total		108	1020	2614	327	151	541	4761		112	1243	2794	462	493	1479	6583
