# Supplementary material for: A Genome-Wide Survey of the Microsatellite Content of the Globe Artichoke Genome and the Development of a Web-Based Database
Source: PLoS One. 2016 Sep 20;11(9):e0162841. doi: 10.1371/journal.pone.0162841 (PMC5029897; doi:10.1371/journal.pone.0162841)
Supplement: S7 Table — (XLSX) [file pone.0162841.s007.xlsx]

## Sheet: Table S7
Supplementary Table S7. Frequency of all Mono-/Di-/Trinucleotide SSR motif and of the ten most frequent Tetra-/Penta-/Hexanucleotide SSR motif in all investigated genomes
Globe artichoke		Sunflower		Horseweed		Tomato		Arabidopsis		Cotton		Sweet orange		Apple		Cucumber		Common bean		Black cottonwood		Grape vine		Rice		Date palm		Banana
Repeats	%	Repeats	%	Repeats	%	Repeats	%	Repeats	%	Repeats	%	Repeats	%	Repeats	%	Repeats	%	Repeats	%	Repeats	%	Repeats	%	Repeats	%	Repeats	%	Repeats	%
A/T	0.809297	A/T	0.947992	A/T	0.972799	A/T	0.575636	A/T	0.98404	A/T	0.9415	A/T	0.861048	A/T	0.97321	A/T	0.944194	A/T	0.846414	A/T	0.94637	A/T	0.936075	C/G	0.61811	A/T	0.814341	A/T	0.602307
C/G	0.190703	C/G	0.052008	C/G	0.0272006	C/G	0.424364	C/G	0.0159603	C/G	0.0585004	C/G	0.138952	C/G	0.0267902	C/G	0.0558064	C/G	0.153586	C/G	0.0536297	C/G	0.0639255	A/T	0.38189	C/G	0.185659	C/G	0.397693
AT/AT	0.736466	AT/AT	0.715442	AT/AT	0.832648	AT/AT	0.786152	AT/AT	0.65754	AT/AT	0.886335	AT/AT	0.484187	AT/AT	0.464905	AT/AT	0.742596	AT/AT	0.878787	AT/AT	0.656109	AT/AT	0.699892	AT/AT	0.540075	AG/CT	0.515976	AT/AT	0.553728
AG/CT	0.157928	AG/CT	0.180182	AC/GT	0.0967893	AC/GT	0.11443	AG/CT	0.278792	AG/CT	0.0648519	AG/CT	0.295038	AG/CT	0.374724	AG/CT	0.201696	AG/CT	0.0923319	AG/CT	0.212101	AG/CT	0.230372	AG/CT	0.361378	AT/AT	0.361431	AG/CT	0.388614
AC/GT	0.105598	AC/GT	0.104109	AG/CT	0.0705267	AG/CT	0.0987502	AC/GT	0.063668	AC/GT	0.0487874	AC/GT	0.218592	AC/GT	0.16004	AC/GT	0.0557078	AC/GT	0.0287201	AC/GT	0.1307	AC/GT	0.0696766	AC/GT	0.0865444	AC/GT	0.119916	AC/GT	0.0574755
CG/CG	7.68208e-06	CG/CG	0.000267759	CG/CG	3.6075e-05	CG/CG	0.000667231			CG/CG	2.58271e-05	CG/CG	0.00182123	CG/CG	0.000330444			CG/CG	0.000161349	CG/CG	0.00108917	CG/CG	6.01178e-05	CG/CG	0.0120029	CG/CG	0.00267645	CG/CG	0.000182245
ATC/ATG	0.288388	AAT/ATT	0.563451	AAT/ATT	0.528868	AAT/ATT	0.623691	AAG/CTT	0.468013	AAT/ATT	0.662311	AAT/ATT	0.584469	AAC/GTT	0.318513	AAT/ATT	0.470337	AAT/ATT	0.670978	AAT/ATT	0.481453	AAT/ATT	0.753135	CCG/CGG	0.474915	AAG/CTT	0.287259	AAT/ATT	0.290546
AAG/CTT	0.258008	ACC/GGT	0.124366	ATC/ATG	0.133837	AAC/GTT	0.117294	ATC/ATG	0.157613	AAG/CTT	0.167242	AAG/CTT	0.144387	AAG/CTT	0.259603	AAG/CTT	0.339569	AAG/CTT	0.147117	AAG/CTT	0.215526	AAG/CTT	0.108945	AGG/CCT	0.132607	AAT/ATT	0.253148	AAG/CTT	0.277404
AAT/ATT	0.230581	ATC/ATG	0.121385	ACC/GGT	0.10599	AAG/CTT	0.11668	AAC/GTT	0.130986	ATC/ATG	0.064376	ATC/ATG	0.0905515	AAT/ATT	0.193951	ATC/ATG	0.0437378	ATC/ATG	0.0593976	AGG/CCT	0.0660421	ATC/ATG	0.0449532	AGC/CTG	0.0844412	AGG/CCT	0.159959	AGG/CCT	0.133456
ACC/GGT	0.11972	AAC/GTT	0.0752766	AAG/CTT	0.0848638	ATC/ATG	0.0747706	AAT/ATT	0.078985	AAC/GTT	0.0306925	AAC/GTT	0.0664384	AGG/CCT	0.0671547	AGG/CCT	0.0410654	ACC/GGT	0.0336507	AAC/GTT	0.0650096	ACC/GGT	0.0267075	ACG/CGT	0.0831385	ATC/ATG	0.0806521	ATC/ATG	0.0865933
AGC/CTG	0.0288789	AAG/CTT	0.0664468	AAC/GTT	0.0732805	ACC/GGT	0.0191935	AGG/CCT	0.0627234	ACC/GGT	0.0252804	AGC/CTG	0.0383186	ACC/GGT	0.0569832	AAC/GTT	0.0363442	AAC/GTT	0.0298186	ATC/ATG	0.0639771	AAC/GTT	0.0238365	AAG/CTT	0.0615272	CCG/CGG	0.0687076	AGC/CTG	0.0612775
AAC/GTT	0.028028	AGC/CTG	0.0183366	ACT/AGT	0.0223863	AGG/CCT	0.0167054	ACC/GGT	0.0430665	AGG/CCT	0.0236425	ACC/GGT	0.0267356	ATC/ATG	0.0455018	ACC/GGT	0.0220916	AGC/CTG	0.0217352	AGC/CTG	0.0385851	AGG/CCT	0.0192279	ACC/GGT	0.0596232	AGC/CTG	0.0489078	AAC/GTT	0.0416667
AGG/CCT	0.0256757	AGG/CCT	0.0146203	AGC/CTG	0.0209459	ACT/AGT	0.0151545	AGC/CTG	0.0228735	AGC/CTG	0.0139576	AGG/CCT	0.0197421	AGC/CTG	0.0322096	AGC/CTG	0.0161233	AGG/CCT	0.0209568	ACC/GGT	0.0382792	AGC/CTG	0.0111816	AAT/ATT	0.0447258	ACC/GGT	0.0400839	CCG/CGG	0.0379482
ACT/AGT	0.0105105	ACT/AGT	0.00956442	AGG/CCT	0.0173449	AGC/CTG	0.00830425	ACT/AGT	0.0175125	ACT/AGT	0.00740609	ACT/AGT	0.0149341	ACG/CGT	0.0103641	ACT/AGT	0.0130055	ACT/AGT	0.00688582	ACT/AGT	0.0190822	ACT/AGT	0.00691296	ATC/ATG	0.025987	AAC/GTT	0.0335737	ACC/GGT	0.0364201
ACG/CGT	0.00530531	CCG/CGG	0.00364427	CCG/CGG	0.00906254	ACG/CGT	0.00533152	ACG/CGT	0.0121515	CCG/CGG	0.00324016	ACG/CGT	0.00721206	CCG/CGG	0.00801387	CCG/CGG	0.0103332	CCG/CGG	0.00682594	ACG/CGT	0.00615679	CCG/CGG	0.0026443	AAC/GTT	0.0167012	ACG/CGT	0.0149575	ACG/CGT	0.0214955
CCG/CGG	0.0049049	ACG/CGT	0.00290966	ACG/CGT	0.00342096	CCG/CGG	0.00287579	CCG/CGG	0.00607577	ACG/CGT	0.00185152	CCG/CGG	0.00721206	ACT/AGT	0.00770564	ACG/CGT	0.00739355	ACG/CGT	0.00263457	CCG/CGG	0.0058891	ACG/CGT	0.00245542	ACT/AGT	0.0163338	ACT/AGT	0.0127515	ACT/AGT	0.0131927
ACAT/ATGT	0.393923	ACAT/ATGT	0.356068	AAAT/ATTT	0.357093	AAAT/ATTT	0.338918	AAAT/ATTT	0.334778	AAAT/ATTT	0.523261	AAAT/ATTT	0.536168	AAAT/ATTT	0.431527	AAAT/ATTT	0.426929	AAAT/ATTT	0.65097	AAAT/ATTT	0.557017	AAAT/ATTT	0.714762	AGAT/ATCT	0.126048	AAAT/ATTT	0.341323	AAAT/ATTT	0.309842
AAAT/ATTT	0.255934	AAAT/ATTT	0.30305	ACAT/ATGT	0.118623	AATT/AATT	0.152837	AAAG/CTTT	0.209101	AAAG/CTTT	0.174165	AATT/AATT	0.111077	ACAT/ATGT	0.143001	AAAG/CTTT	0.244807	AATT/AATT	0.089097	AAAG/CTTT	0.123389	AATT/AATT	0.0836314	AAAT/ATTT	0.0907986	ACAT/ATGT	0.209086	ACAT/ATGT	0.141102
AATT/AATT	0.104831	AAAC/GTTT	0.0924915	AAAG/CTTT	0.111111	ACAT/ATGT	0.125532	AAAC/GTTT	0.148429	AATT/AATT	0.104558	AAAG/CTTT	0.0997276	AAAC/GTTT	0.111143	AATT/AATT	0.090319	AAAG/CTTT	0.0692977	AATT/AATT	0.0717564	AAAG/CTTT	0.0570281	ATCG/ATCG	0.0843564	AAAG/CTTT	0.170783	AAAG/CTTT	0.122985
AAAG/CTTT	0.0410086	AATT/AATT	0.0421384	AGAT/ATCT	0.0749476	AAAG/CTTT	0.107181	ACAT/ATGT	0.0650054	ACAT/ATGT	0.0723226	ACAT/ATGT	0.097609	AATT/AATT	0.067176	AAAC/GTTT	0.0597181	AGAT/ATCT	0.0341137	ACAT/ATGT	0.0406002	AAAC/GTTT	0.0335113	ACAT/ATGT	0.0814392	AGGG/CCCT	0.0693983	AGAT/ATCT	0.066943
AGAT/ATCT	0.0399002	AAAG/CTTT	0.0420496	AATT/AATT	0.0642907	AGAT/ATCT	0.0745567	AATT/AATT	0.0476706	AATG/ATTC	0.030346	AAAC/GTTT	0.0369249	AAAG/CTTT	0.0633559	ACAT/ATGT	0.0433976	AATG/ATTC	0.026087	AGGG/CCCT	0.0382171	ACAT/ATGT	0.0316986	AAAG/CTTT	0.0650298	AGAT/ATCT	0.0392744	AATT/AATT	0.0370029
AAAC/GTTT	0.0274314	AGAT/ATCT	0.0285955	AAAC/GTTT	0.0462963	AATG/ATTC	0.0572695	AATC/ATTG	0.0411701	AAAC/GTTT	0.0292242	AATC/ATTG	0.0157385	AGGG/CCCT	0.036399	AATG/ATTC	0.023368	ACAT/ATGT	0.0238127	AAAC/GTTT	0.0281553	AATC/ATTG	0.0202832	ATCC/ATGG	0.057129	ATGC/ATGC	0.0293141	AATC/ATTG	0.0365423
ATGC/ATGC	0.0190265	AATC/ATTG	0.0226011	AATC/ATTG	0.0372117	AACT/AGTT	0.0348404	AGAT/ATCT	0.0292524	ATGC/ATGC	0.00932814	AATG/ATTC	0.0130145	ATGC/ATGC	0.0183797	AAGG/CCTT	0.0196588	AAAC/GTTT	0.0228763	AGCT/AGCT	0.0178288	AGAT/ATCT	0.014355	AATT/AATT	0.0521454	AAAC/GTTT	0.0194348	AGGG/CCCT	0.0348534
AGGG/CCCT	0.0154244	AACT/AGTT	0.0175392	AGCT/AGCT	0.033543	AAAC/GTTT	0.0201241	AACT/AGTT	0.0195016	AGAT/ATCT	0.00808832	ATGC/ATGC	0.0105932	AGCC/CTGG	0.0126135	AGAT/ATCT	0.016135	ACTC/AGTG	0.0173913	AGAT/ATCT	0.0157105	AGGG/CCCT	0.0107295	AGGG/CCCT	0.0520238	AATT/AATT	0.0133614	ATGC/ATGC	0.0345463
AACC/GGTT	0.0136695	AATG/ATTC	0.0127437	AAGT/ACTT	0.0326695	ACCC/GGGT	0.0192376	AACC/GGTT	0.0184182	AATC/ATTG	0.00755697	AGAT/ATCT	0.0104419	AAGG/CCTT	0.0122531	AGGG/CCCT	0.0126113	AACT/AGTT	0.00856187	AATC/ATTG	0.0130627	AAGG/CCTT	0.00592818	AGCT/AGCT	0.0414489	ATCC/ATGG	0.0119848	ATCC/ATGG	0.0288653
ATCC/ATGG	0.0135772	ATGC/ATGC	0.00848097	AATG/ATTC	0.0321454	ACGC/CGTG	0.0187943	AATG/ATTC	0.0184182	AACT/AGTT	0.00472311	AGCT/AGCT	0.00771792	AATC/ATTG	0.0122531	AATC/ATTG	0.0124258	ATGC/ATGC	0.00802676	AAGG/CCTT	0.0112974	AATG/ATTC	0.00553623	ATGC/ATGC	0.0412058	AAGG/CCTT	0.011175	AAGG/CCTT	0.0239521
AACCC/GGGTT	0.18666	AATAT/ATATT	0.226848	AAAAT/ATTTT	0.244288	AAAAT/ATTTT	0.348666	AAAAT/ATTTT	0.19943	AAAAT/ATTTT	0.430212	AAAAT/ATTTT	0.340125	AAAAT/ATTTT	0.253921	AAAAG/CTTTT	0.383959	AAAAT/ATTTT	0.447856	AAAAT/ATTTT	0.337367	AAAAT/ATTTT	0.576804	AAAAG/CTTTT	0.147486	AAAAG/CTTTT	0.268827	AAAAT/ATTTT	0.222581
AAACC/GGTTT	0.124826	AAAAT/ATTTT	0.0875585	AATAT/ATATT	0.14587	AATAT/ATATT	0.144236	AAAAC/GTTTT	0.156695	AATAT/ATATT	0.109457	AAAAG/CTTTT	0.139219	AAAAC/GTTTT	0.0843373	AAAAT/ATTTT	0.147895	AATAT/ATATT	0.107994	AAAAG/CTTTT	0.198451	AAAAG/CTTTT	0.132634	AGAGG/CCTCT	0.0934863	AAAAT/ATTTT	0.206864	AATAT/ATATT	0.0909677
AAAAT/ATTTT	0.10491	AACAT/ATGTT	0.0724977	AAAAG/CTTTT	0.0746924	AAAAG/CTTTT	0.0760931	AACTC/AGTTG	0.139601	AAAAG/CTTTT	0.100316	AGGGG/CCCCT	0.0611205	AACCG/CGGTT	0.0788816	AAATT/AATTT	0.0574516	AAATT/AATTT	0.0836421	AACCG/CGGTT	0.0779284	AAATT/AATTT	0.0633354	AATAT/ATATT	0.0742491	AATAT/ATATT	0.194153	AAAAG/CTTTT	0.0625806
ACAGG/CCTGT	0.0905512	ATATC/ATATG	0.0565014	AAAAC/GTTTT	0.0404218	AATAC/ATTGT	0.0556502	AAAAG/CTTTT	0.0940171	AAATT/AATTT	0.097035	AAATT/AATTT	0.0514997	ACGGG/CCCGT	0.0775176	AAAAC/GTTTT	0.0511945	AAAAG/CTTTT	0.077819	AAATT/AATTT	0.0689739	AAAAC/GTTTT	0.0390705	AGGGG/CCCCT	0.0681741	ACCCG/CGGGT	0.073721	AGAGG/CCTCT	0.0425806
AATAT/ATATT	0.0530338	AAAAC/GTTTT	0.0394761	AAATT/AATTT	0.0404218	AAATT/AATTT	0.0539466	AAGAG/CTCTT	0.0655271	AATCG/ATTCG	0.0291808	AACCG/CGGTT	0.0498019	AAAAG/CTTTT	0.059559	AAGAG/CTCTT	0.0472127	AAGAG/CTCTT	0.0561143	AATAT/ATATT	0.0525169	AATAT/ATATT	0.0271437	AAAAT/ATTTT	0.0469119	AAAAC/GTTTT	0.0289164	AAAAC/GTTTT	0.0380645
AAAAG/CTTTT	0.0372858	AATAC/ATTGT	0.0392891	AACCC/GGGTT	0.0351494	ACCCC/GGGGT	0.0471323	AAACC/GGTTT	0.0541311	ACAGG/CCTGT	0.026251	AAAAC/GTTTT	0.041313	AAGAT/ATCTT	0.0368266	AAAGG/CCTTT	0.0369738	AAAAC/GTTTT	0.0217046	AAAAC/GTTTT	0.0411423	CCCCG/CGGGG	0.0217972	ACGCC/CGTGG	0.0458994	CCCGG/CCGGG	0.0184303	AGGCG/CCTCG	0.0380645
AAATT/AATTT	0.0305697	AATGG/ATTCC	0.0389149	AAATG/ATTTC	0.0342707	AAGAG/CTCTT	0.0329358	AACCG/CGGTT	0.0512821	AAAAC/GTTTT	0.0234384	AATAT/ATATT	0.0339559	ACTGG/AGTCC	0.0295522	AACCC/GGGTT	0.0301479	AAATC/ATTTG	0.0206458	AAGAG/CTCTT	0.0249274	AAATC/ATTTG	0.0121324	AAGAG/CTCTT	0.0371245	AGAGG/CCTCT	0.017477	AAATT/AATTT	0.0296774
CCCGG/CCGGG	0.028717	ACCCG/CGGGT	0.0295603	AAATC/ATTTG	0.0246046	AAAAC/GTTTT	0.0249858	AACAC/GTGTT	0.031339	AATTC/AATTG	0.0216805	AAGAG/CTCTT	0.0226372	AATCC/ATTGG	0.0275063	AATAT/ATATT	0.0238908	AACAC/GTGTT	0.0206458	AGAGG/CCTCT	0.0159729	AAAGG/CCTTT	0.010693	AGGCG/CCTCG	0.0296996	AAGAG/CTCTT	0.0152526	AAGAG/CTCTT	0.0258065
AATCC/ATTGG	0.0250116	AACCC/GGGTT	0.0290926	AATGT/ACATT	0.0210896	ATATC/ATATG	0.0215786	ACCCG/CGGGT	0.017094	CCCGG/CCGGG	0.01711	AAATC/ATTTG	0.0192417	AAATT/AATTT	0.0270516	AGAGG/CCTCT	0.0193402	AAACC/GGTTT	0.0174696	AAAGG/CCTTT	0.0145208	CCCGG/CCGGG	0.0104874	AGCCG/CGGCT	0.0232872	AAATT/AATTT	0.0111217	ACCGT/ACGGT	0.0245161
AAAAC/GTTTT	0.0229273	ACTAT/AGTAT	0.0272217	AAACC/GGTTT	0.0202109	ACCCG/CGGGT	0.0187394	AAATT/AATTT	0.014245	ATATC/ATATG	0.0164069	AATCT/AGATT	0.0141483	AATAT/ATATT	0.0270516	AAGGG/CCCTT	0.0159272	ATATC/ATATG	0.00899947	AAATC/ATTTG	0.0123427	ACCCC/GGGGT	0.00740284	AGGGC/CCCTG	0.0219372	ACCCC/GGGGT	0.00953289	AGGGG/CCCCT	0.0225806
ACATAT/ATATGT	0.118588	ACCACT/AGTGGT	0.0901999	AGATAT/ATATCT	0.221881	AACAAT/ATTGTT	0.0961417	AAAAAT/ATTTTT	0.0674157	AAAAAT/ATTTTT	0.243134	AAAAAG/CTTTTT	0.113665	AAAAAT/ATTTTT	0.139741	AAAAAG/CTTTTT	0.170732	AAGCCC/CTTGGG	0.130068	AAAAAT/ATTTTT	0.217129	AAAAAT/ATTTTT	0.322736	ACATAT/ATATGT	0.0765379	AGAGGG/CCCTCT	0.143399	ACATAT/ATATGT	0.204601
AAAAAT/ATTTTT	0.0544082	AAAGTC/ACTTTG	0.0875995	AAGATT/AATCTT	0.0756646	AAAAAT/ATTTTT	0.0689437	ACCACG/CGTGGT	0.0674157	AATCAG/ATTCTG	0.15978	AAAAAT/ATTTTT	0.111111	AAAAAG/CTTTTT	0.0571934	AAAAAT/ATTTTT	0.0522648	AAAAAT/ATTTTT	0.103041	AAAAAG/CTTTTT	0.137515	AAAAAG/CTTTTT	0.147399	ACGGCG/CCGTCG	0.055794	AAAAAT/ATTTTT	0.110774	AAAAAT/ATTTTT	0.0558751
AGATAT/ATATCT	0.0275372	AACAAT/ATTGTT	0.0776857	AAAAAT/ATTTTT	0.0685072	AACCCT/AGGGTT	0.0619861	AAAAAC/GTTTTT	0.0617978	AAAAAG/CTTTTT	0.0630523	ACATAT/ATATGT	0.0395913	ACATAT/ATATGT	0.0536557	AAAGAG/CTCTTT	0.0426829	AAAGTC/ACTTTG	0.0810811	AAAAAC/GTTTTT	0.0341777	AAAAAC/GTTTTT	0.0370906	AGGCGG/CCGCCT	0.0550787	AAAAAG/CTTTTT	0.0827011	AAATAT/ATATTT	0.0451931
AACCGG/CCGGTT	0.0259827	AATAGT/ACTATT	0.0664716	AAATAT/ATATTT	0.0541922	ACATAT/ATATGT	0.0468058	AAGATG/ATCTTC	0.0449438	AACAGT/ACTGTT	0.0527824	AAAAAC/GTTTTT	0.0357599	AAAAAC/GTTTTT	0.0471698	AAGAGG/CCTCTT	0.0391986	AAAAAG/CTTTTT	0.0616554	AGAGGG/CCCTCT	0.0341777	AGAGGG/CCCTCT	0.0303468	ACCGCC/CGGTGG	0.0472103	AGCCCG/CGGGCT	0.0698027	AAGAGG/CCTCTT	0.0369762
AAGAGG/CCTCTT	0.0230957	ACATAT/ATATGT	0.0471315	ACATAT/ATATGT	0.0276074	AAGGAG/CCTTCT	0.0449083	AAAGAG/CTCTTT	0.0280899	AAAATT/AATTTT	0.0365417	AAAATT/AATTTT	0.0280971	AGAGGG/CCCTCT	0.0418632	AAGGAG/CCTTCT	0.0339721	AAAGAG/CTCTTT	0.0456081	AACAAT/ATTGTT	0.0297547	AAAATT/AATTTT	0.0279383	AAAAAG/CTTTTT	0.0457797	ACATAT/ATATGT	0.0652504	AGAGGG/CCCTCT	0.0312243
ACACAT/ATGTGT	0.0222074	AAATAT/ATATTT	0.0466439	AAAGAT/ATCTTT	0.0194274	AATAGT/ACTATT	0.0411132	AAGCAG/CTGCTT	0.0280899	AAATAT/ATATTT	0.0305708	AAAGAG/CTCTTT	0.0191571	ACTCTC/AGAGTG	0.0324292	AAAAGG/CCTTTT	0.033101	AAATAT/ATATTT	0.0396959	AATAGT/ACTATT	0.0289505	AAATAT/ATATTT	0.0168593	AGAGGG/CCCTCT	0.0429185	AAGGAG/CCTTCT	0.0280728	ACACAT/ATGTGT	0.0188989
ACCTCC/AGGTGG	0.0222074	AAAAAT/ATTTTT	0.0336421	AAAAAG/CTTTTT	0.0153374	AAAGCC/CTTTGG	0.0379507	ACCATC/ATGGTG	0.0280899	ACATAT/ATATGT	0.0269883	AAGATG/ATCTTC	0.0191571	AAGAGG/CCTCTT	0.0241745	AAAAAC/GTTTTT	0.0209059	AATATT/AATATT	0.0396959	AAAATT/AATTTT	0.0233213	AAAAGG/CCTTTT	0.0163776	AGGGGG/CCCCCT	0.0307582	AACCCT/AGGGTT	0.0242792	AAAAAG/CTTTTT	0.0180772
AAGGAG/CCTTCT	0.020875	AATATT/AATATT	0.0308792	AATTAT/AATTAT	0.0153374	ACGATG/ATCGTC	0.0322581	AAACGC/CGTTTG	0.0224719	AAAATG/ATTTTC	0.0217339	AAAAGC/CTTTTG	0.0166028	ACAGAG/CTCTGT	0.0229953	AGAGGG/CCCTCT	0.0200348	AAAATT/AATTTT	0.0346284	ACCATC/ATGGTG	0.0229192	AACAAT/ATTGTT	0.0154143	AGAGAT/ATCTCT	0.0250358	AAATAT/ATATTT	0.022003	AAGGGG/CCCCTT	0.0180772
AAAAAG/CTTTTT	0.0199867	AGATAT/ATATCT	0.0208029	AATTCC/AATTGG	0.0153374	ACCCCC/GGGGGT	0.0290955	AACAAG/CTTGTT	0.0224719	AATTAT/AATTAT	0.0138524	AATCAG/ATTCTG	0.0153257	AAGGAG/CCTTCT	0.0206368	AAGATG/ATCTTC	0.0191638	AACAAT/ATTGTT	0.0236486	ACATAT/ATATGT	0.0184962	AAAGAG/CTCTTT	0.0130058	ACGCCG/CGGCGT	0.0228898	AAAATT/AATTTT	0.0197269	AGGCGG/CCGCCT	0.0164339
AAGATG/ATCTTC	0.0197646	AAAAAC/GTTTTT	0.0162522	AAGATG/ATCTTC	0.0122699	AATGAT/ATCATT	0.028463	AAGGAG/CCTTCT	0.0224719	AAATTT/AAATTT	0.0131359	ACCCTC/AGGGTG	0.0153257	ATCGGC/ATGCCG	0.0165094	ACATAT/ATATGT	0.0191638	AACCCT/AGGGTT	0.0126689	AATTAT/AATTAT	0.0156815	ACCTCC/AGGTGG	0.0130058	ACCTCC/AGGTGG	0.0207439	AGATAT/ATATCT	0.0182094	AACCCT/AGGGTT	0.0139688
